# Supplementary material for: Low-temperature open-atmosphere growth of WO3 thin films with tunable and high-performance photoresponse
Source: Royal Society of Chemistry journal article supplement (doi:10.1039/d3tc02257a), 2024-01-01
Supplement: d3tc02257a1.pdf [file d3tc02257a1.pdf]

## Supporting Information

# Low-temperature Open-atmosphere Growth of WO<sub>3</sub> Thin Films with Tunable and High-performance Photoresponse

Zhuotong Sun,<sup>a</sup> Subhajit Bhattacharjee,<sup>b</sup> Ming Xiao,<sup>a,\*,#</sup> Weiwei Li,<sup>c</sup> Megan O. Hill,<sup>a</sup> Robert A. Jagt,<sup>a</sup> Louis-Vincent Delumeau,<sup>d,e</sup> Kevin P. Musselman,<sup>d,e</sup> Erwin Reisner,<sup>b</sup> and Judith L. MacManus-Driscoll<sup>a,\*</sup>

<sup>a</sup>Department of Materials Science & Metallurgy, University of Cambridge, Cambridge, CB3 0FS, United Kingdom.

<sup>b</sup>Yusuf Hamied Department of Chemistry, University of Cambridge, Lensfield Road, Cambridge CB2 1EW, United Kingdom

<sup>c</sup>College of Physics, MIIT Key Laboratory of Aerospace Information Materials and Physics, Nanjing University of Aeronautics and Astronautics, Nanjing 211106, China

<sup>d</sup>Department of Mechanical and Mechatronics Engineering, University of Waterloo, Waterloo, Ontario N2L 3G1, Canada

<sup>e</sup>Waterloo Institute for Nanotechnology, Waterloo, Ontario N2L 3G1, Canada

\*Corresponding Authors: Ming Xiao ([xiaom37@mail.sysu.edu.cn](mailto:xiaom37@mail.sysu.edu.cn)) and Judith L. MacManus-Driscoll ([jld35@cam.ac.uk](mailto:jld35@cam.ac.uk))

<sup>#</sup>Present address: School of Microelectronics Science and Technology, Sun Yat-sen University, Zhuhai, 519082, Guangdong Province, China

**Table S1.** Parameters for the deposition of WO<sub>3</sub> film for the growth of WO<sub>3</sub> thin film using AP-SCVD in this work.

| PROCESS PARAMETER                                 | PARAMETER RANGE                        |
|---------------------------------------------------|----------------------------------------|
| Ar carrier gas flow rate through precursor (sccm) | 100-350                                |
| Substrate oscillation speed (mm/s)                | 10-90                                  |
| Head-to-substrate spacing (μm)                    | 200-1200                               |
| Oscillation cycles                                | 100-3000                               |
| Deposition time (min)                             | 3-60                                   |
| Film thickness (nm)                               | 10-200                                 |
| Oxidant                                           | H <sub>2</sub> O, O <sub>2</sub> , Air |

**Table S2.** Summary of growth rate for different conditions as shown in Figure 2b.

| Condition No. | Growth rate per<br>cycle (g <sub>c</sub> , nm/cycle) | Oscillation speed<br>(mm/s) | Growth rate<br>(nm/min) |
|---------------|------------------------------------------------------|-----------------------------|-------------------------|
| 1             | 0.135                                                | 10                          | 5.4                     |
| 2             | 0.027                                                | 50                          | 5.4                     |
| 3             | 0.068                                                | 10                          | 2.7                     |
| 4             | 0.015                                                | 90                          | 5.4                     |
| 5             | 0.0135                                               | 50                          | 2.7                     |
| 6             | 0.034                                                | 10                          | 1.35                    |
| 7             | 0.0075                                               | 90                          | 2.7                     |
| 8             | 0.00675                                              | 50                          | 1.35                    |
| 9             | 0.00375                                              | 90                          | 1.35                    |

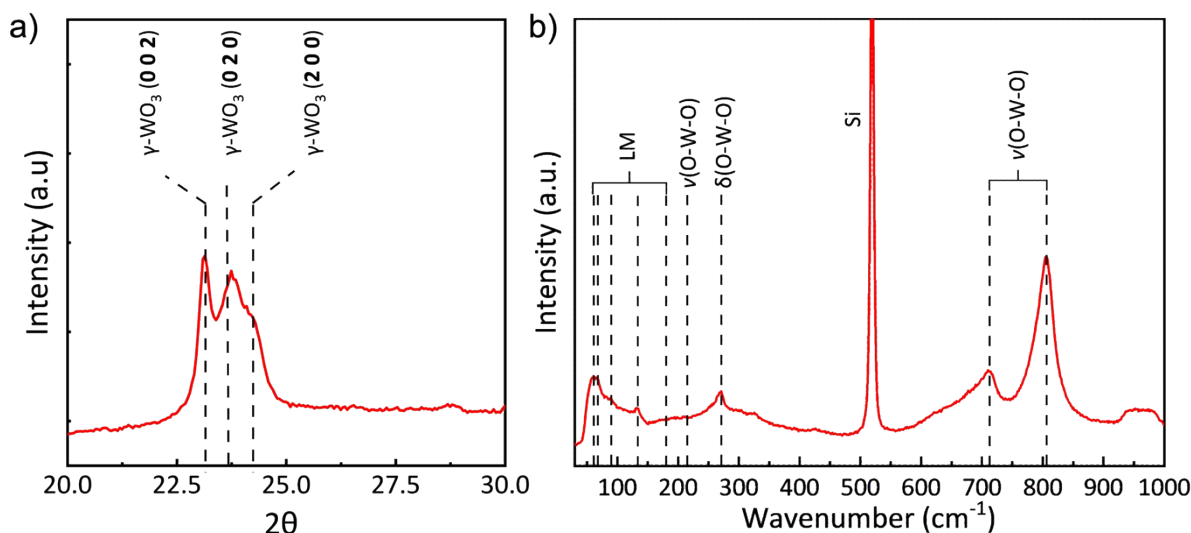

**Figure S1.** a) XRD pattern at  $2\theta$  from  $20^\circ$  to  $30^\circ$  of 200 nm film on  $\text{SiO}_2/\text{Si}$  substrate, b) Raman spectra for 200 nm film on  $\text{SiO}_2/\text{Si}$  substrate. LM indicates lattice mode. The peaks relating only to the  $\text{WO}_3$  film are labeled O-W-O.

X-ray diffraction and Raman analysis were used to explore a 200 nm thick film, thick enough to obtain a sufficient signal. The film was deposited at 50 mm/s oscillation speed, 200 sccm gas flow rate through the precursor and 1000  $\mu\text{m}$  spacing. Figure S1a shows a narrow part of an X-ray diffraction pattern from  $20^\circ$  to  $30^\circ$ , which shows the only peaks that are visible over a range of  $10^\circ$  to  $80^\circ$ . The three peaks observed at  $23.1^\circ$ ,  $23.6^\circ$ , and  $24.4^\circ$ , correspond to the three most intense peaks of monoclinic  $\text{WO}_3$ , i.e. (0 0 2), (0 2 0), and (2 0 0) (JCPDS-01-083-0950). No other orientations were observed. Figure S2b shows the Raman spectrum of the same film, along with a bare  $\text{SiO}_2/\text{Si}$  substrate with the reference monoclinic  $\text{WO}_3$  peaks shown in dashed lines.<sup>[1]</sup> Silicon peaks were observed at 301  $\text{cm}^{-1}$ , 510  $\text{cm}^{-1}$ , and 950  $\text{cm}^{-1}$ , with the peak at 510  $\text{cm}^{-1}$  being a one-phonon peak and the broad peak at 950  $\text{cm}^{-1}$  being the most intense two-phonon peak.<sup>[1]</sup> For  $\text{WO}_3$ , peaks are observed at 61 and 132  $\text{cm}^{-1}$  (lattice modes of monoclinic  $\text{WO}_3$ ), 270  $\text{cm}^{-1}$  (bending mode of (O-W-O)), 325  $\text{cm}^{-1}$  (stretching mode of (W-OH<sub>2</sub>) from surface hydrates), 691 and 804

cm<sup>-1</sup> (stretching modes of (O-W-O)).<sup>[2]</sup> This result further confirms the monoclinic phase of the as-deposited WO<sub>3</sub> films.

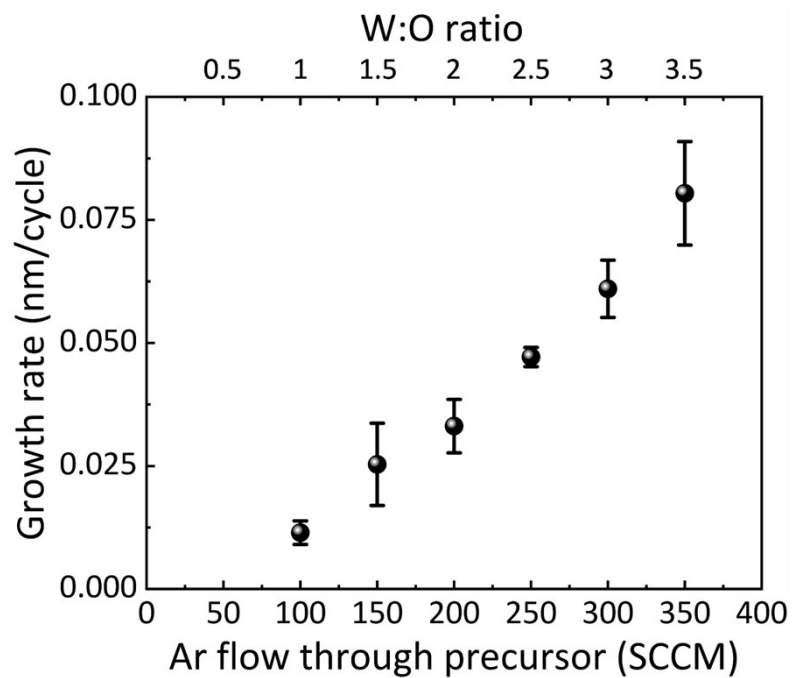

**Figure S2.** Effect of film thickness with the change of W:O ratio adapted from Figure 1 from the main text. It should be noted the oscillation speed remains at 50 mm/s in this case.

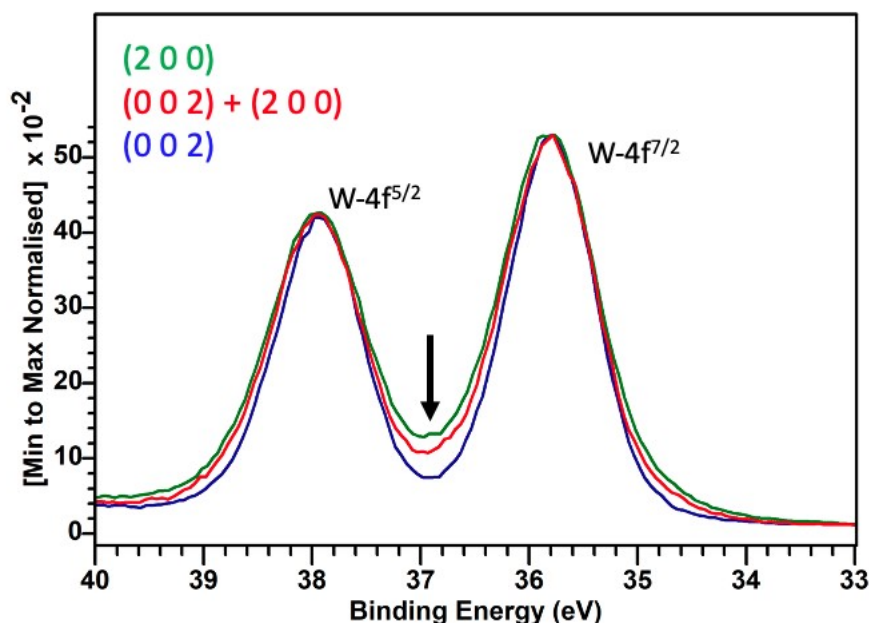

**Figure S3.** Overlay of normalized W-4f spectra of 30 nm (2 0 0) dominant, ‘(2 0 0) + (0 0 2)’ mixture and (0 0 2) dominant WO<sub>3</sub> film.

Figure S3 shows the overlay of intensity normalized W-4f spectra for the samples from Figure 4c. The W-4f peaks are observed with approximately 2.14 eV splitting between W-4f<sup>5/2</sup> and W-4f<sup>7/2</sup> peaks. While the peak splitting remains constant between films, a variation in relative intensity between 4f<sup>5/2</sup> and 4f<sup>7/2</sup> is observed, marked by a black arrow. This suggests the presence of an additional component within the 4f spectra.

Additionally, Figure S4 compares XPS spectra from two films grown under the same growth conditions (condition 9). The film characterized in this work is shown on the left. Under condition 9, this film is (0 0 2) oriented and gives a W<sup>5+</sup> atomic ratio of 0.9%. The second film grown for comparison under condition 9 is shown on the right. This film also shows an (0 0 2) orientation and gives a W<sup>5+</sup> atomic ratio of 0.7%. This 0.2% difference in W<sup>5+</sup> percent between

the two films of the same condition shows that the concentration change between growth conditions (0.9%, 2.4%, and 3.2% for conditions 9, 5, and 1 respectively) is significant.



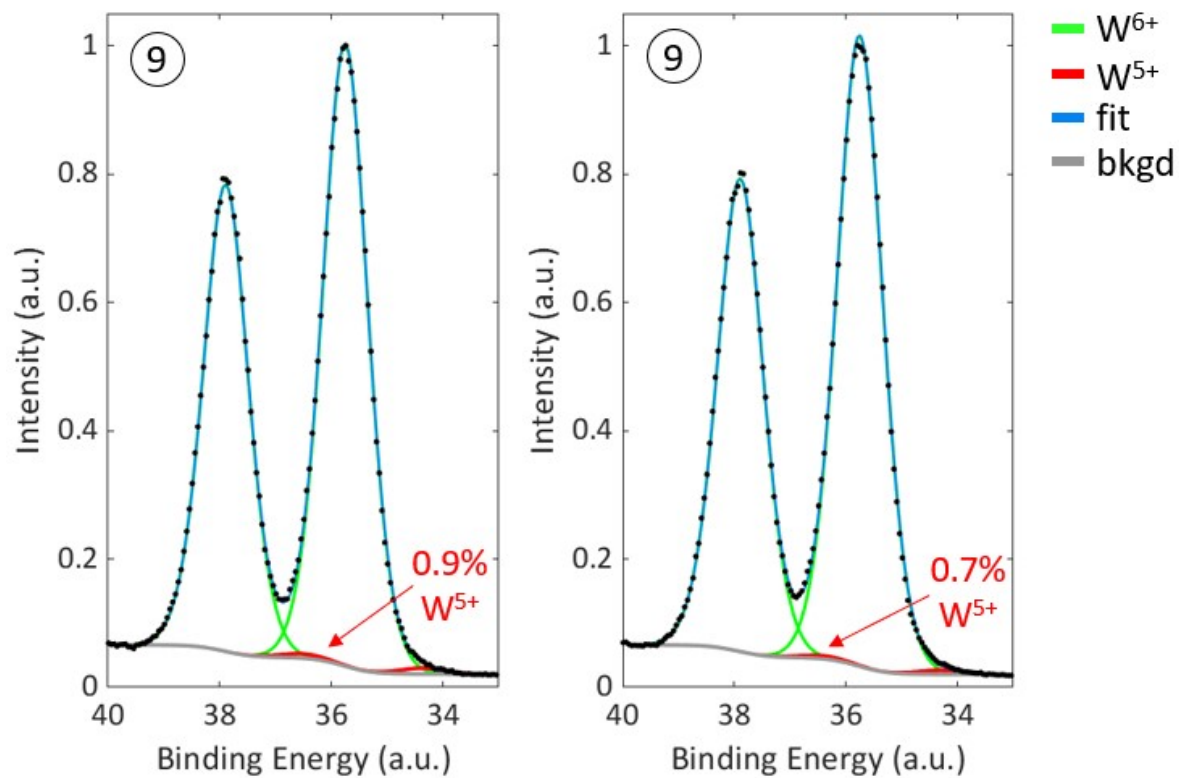

**Figure S4.** Comparison of XPS spectra from two films grown under the same growth conditions (condition 9). The film characterized in this work is shown on the left. The second film grown for comparison at condition 9 is shown on the right. Both films are (0 0 2) oriented.

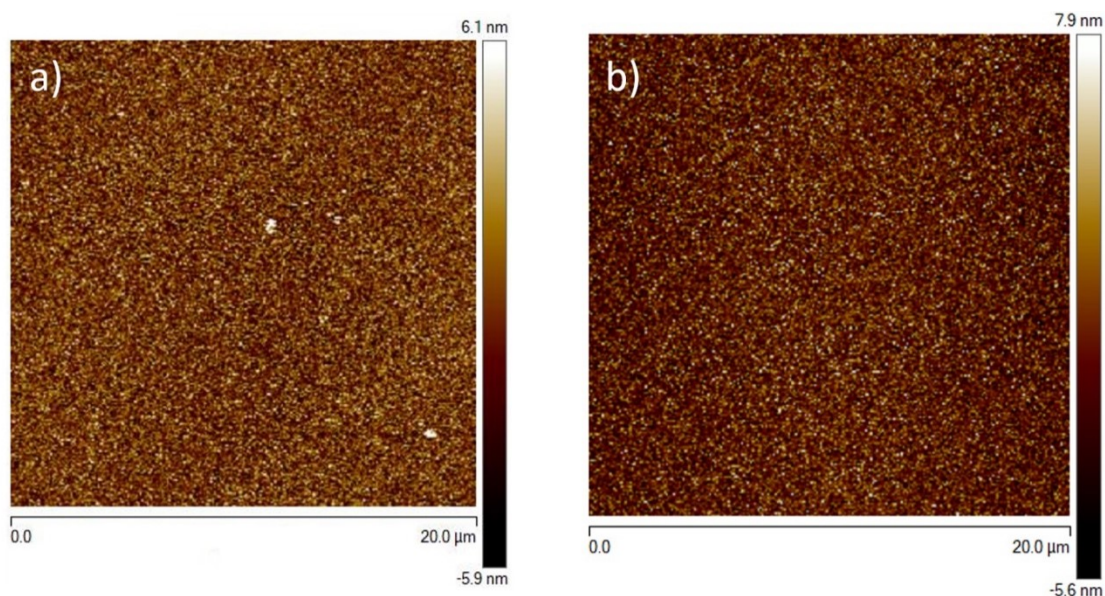

**Figure S5.** 20  $\mu\text{m} \times 20 \mu\text{m}$  AFM images of a) (2 0 0) dominant, and b) (0 0 2) dominant  $\text{WO}_3$  films with 30 nm thickness

20  $\mu\text{m}$  by 20  $\mu\text{m}$  AFM images were taken to analyze the surface roughness of as-deposited  $\text{WO}_3$  films. Figure S5a is the image of 30 nm (2 0 0) dominant orientation thin film and Figure S5b is an image of a 30 nm (0 0 2) dominant orientation thin film. NanoScope Analysis Software was used to analyze and obtain the film roughness.

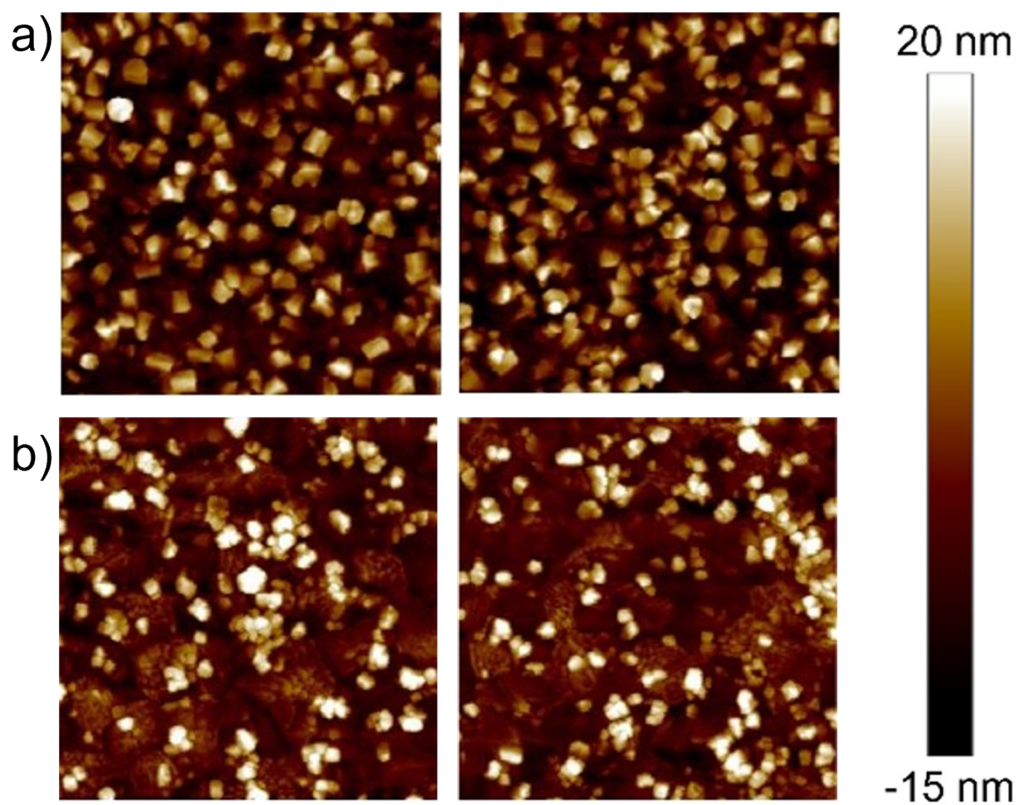

**Figure S6.** AFM characterization of surface morphology of WO<sub>3</sub> film at random locations on the Si substrates with the dominant orientation of a) (2 0 0) and b) (0 0 2), respectively. Consistent surface morphology over different locations on the Si substrate could be observed, confirming the uniformity of the as-deposited WO<sub>3</sub> film.

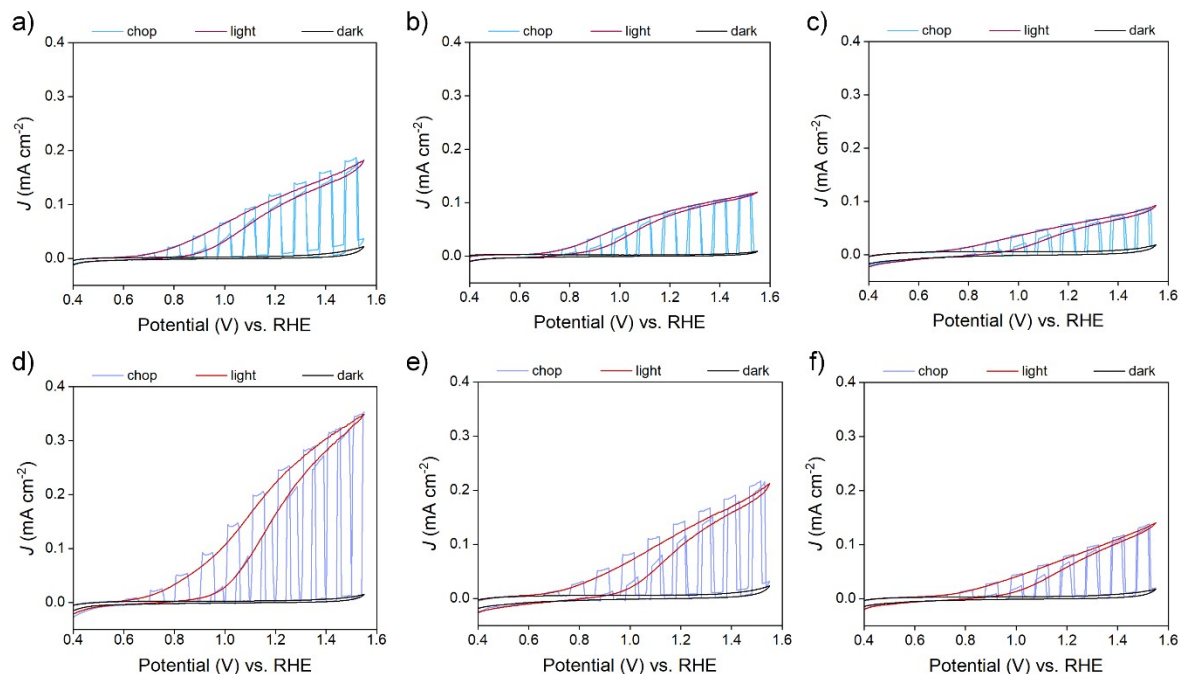

**Figure S7.** a-c) CV scans under chopped, continuous, and no artificial sunlight irradiation (1 sun) of the (a)  $\text{WO}_3$ -[002], (b)  $\text{WO}_3$ -[002]+[200] and (c)  $\text{WO}_3$ -[200] photoanodes. d-f) CV scans under chopped, continuous and no artificial concentrated sunlight irradiation (3 suns) of the (d)  $\text{WO}_3$ -[002], (e)  $\text{WO}_3$ -[002]+[200] and (f)  $\text{WO}_3$ -[200] photoanodes. Conditions: AM 1.5G, 0.5 M aqueous NaCl (pH ~6), room temperature.

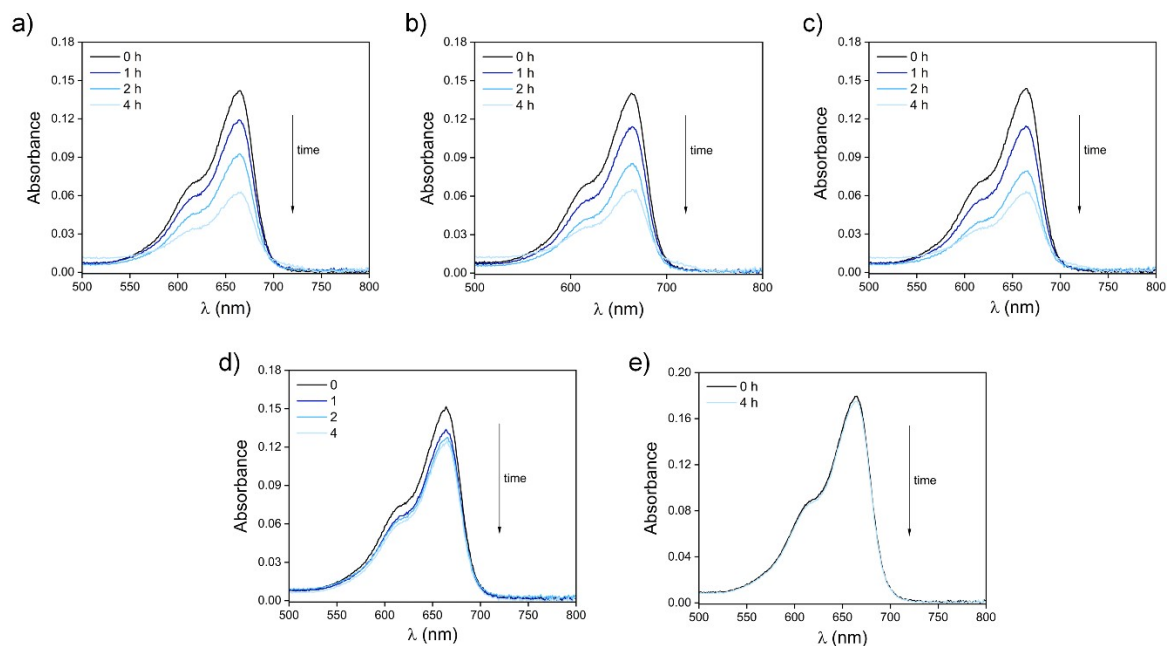

**Figure S8.** a-c) Absorption spectra of aqueous MB solution at different time intervals in presence of (a)  $\text{WO}_3$ -[002], (b)  $\text{WO}_3$ -[002]+[200], and (c)  $\text{WO}_3$ -[200] films under simulated sunlight (AM 1.5G, 1 sun). d-e) Control experiments in the absence of d)  $\text{WO}_3$  film and e) light. The peak at ~664 nm is the characteristic peak of MB used for monitoring the degradation process.

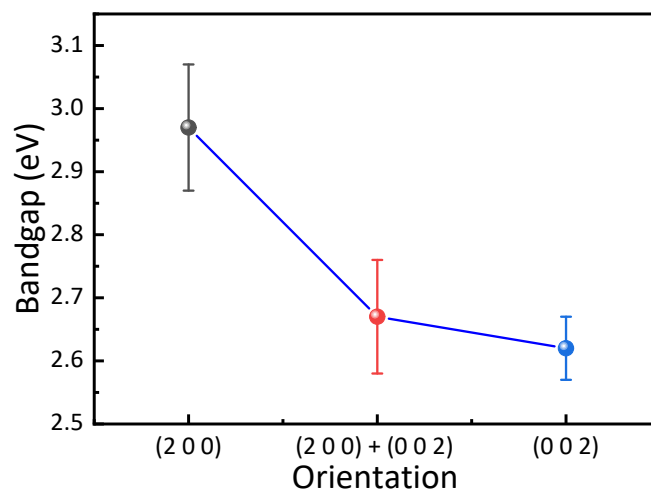

**Figure S9.** The band gap of 30 nm as-deposited WO<sub>3</sub> films on SiO<sub>2</sub>/Si substrate with different orientations.

## References

- [1] K. Uchinokura, T. Sekine, E. Matsuura, Raman scattering by silicon *Solid State Commun.* **1972**, *11*, 47-49.
- [2] M. F. Daniel, B. Desbat, J. C. Lassegues, B. Gerand, M. Figlarz, Infrared and Raman study of WO<sub>3</sub> tungsten trioxides and WO<sub>3</sub>, xH<sub>2</sub>O tungsten trioxide hydrates *J. Solid State Chem.* **1987**, *67*, 235-247.
